# Supplementary material for: Genomic Evolution of the Pathogenic Wolbachia Strain, wMelPop
Source: Oxford University Press journal article supplement (doi:10.1093/gbe/evt169), 2013-11-01
Supplement: evt169_Supplementary_Data.zip [file evt169_Supplementary_Data.zip]

Archive with 2 entries (2 files):
- woolfit.datafile1.xls
- woolfit.supplementary.pdf
