# Supplementary material for: Genomic Evolution of the Pathogenic Wolbachia Strain, wMelPop
Source: Oxford University Press journal article supplement (doi:10.1093/gbe/evt169), 2013-11-01
Supplement: evt169_Supplementary_Data.zip [file evt169_Supplementary_Data.zip › woolfit.datafile1.xls]

## Sheet: data
Position in wMel reference	Change type	wMel	wMelPop	CDS/intergenic/pseudogene/rRNA	Gene or flanking genes	Synon/non-synon if in CDS	Comment
15742	substitution	A	G	CDS	WD0016	synonymous	n/a
18552	substitution	A	G	CDS	WD0019	non-synonymous	n/a
25603	substitution	G	A	CDS	WD0024	synonymous	n/a
26870	substitution	G	A	CDS	WD0024	non-synonymous	n/a
30723	insertion-before	-	T	CDS	WD0027	frameshift	Results in joining of WD0026 and WD0027 into single CDS
36114	substitution	C	T	CDS	WD0033	non-synonymous	n/a
39135	substitution	A	C	CDS	WD0036	non-synonymous	n/a
45207	substitution	A	G	CDS	WD0041	non-synonymous	n/a
45288	deletion-from	TGTACA	-	intergenic	WD0041,WD0042	n/a	n/a
52597	deletion-from	TGCGATAAT	-	CDS	WD0053	in-frame	n/a
54973	substitution	G	A	intergenic	WD0054,WD0056	n/a	n/a
65076	substitution	A	G	CDS	WD0068	non-synonymous	n/a
69287	substitution	A	G	CDS	WD0073	non-synonymous	n/a
79898	substitution	G	A	CDS	WD0086	non-synonymous	n/a
94978	substitution	T	C	CDS	WD0103	synonymous	n/a
109211	substitution	T	G	CDS	WD0115	non-synonymous	Mutation in stop codon, results in extension of protein by 29 codons
118051	substitution	C	T	CDS	WD0129	non-synonymous	n/a
118692	substitution	A	G	CDS	WD0130	non-synonymous	n/a
119806	substitution	A	G	CDS	WD0131	non-synonymous	n/a
139161	substitution	T	C	CDS	WD0151	synonymous	n/a
151274	substitution	T	A	intergenic	WD0162,WD0164	n/a	n/a
156881	insertion-before	-	AGAGT	intergenic	WD0168,WD0170	n/a	n/a
164590	substitution	T	G	CDS	WD0179	non-synonymous	n/a
173865	substitution	C	T	CDS	WD0190	non-synonymous	n/a
183394	substitution	G	A	rRNA	Wp23SB	n/a	n/a
200034	substitution	G	T	CDS	WD0219	non-synonymous	n/a
201340	substitution	G	A	CDS	WD0221	synonymous	n/a
203561	substitution	C	T	CDS	WD0223	non-synonymous	n/a
204413	substitution	T	C	CDS	WD0223	non-synonymous	n/a
222379	deletion-from	G	-	intergenic	WD0234,WD0235	n/a	n/a
248476	substitution	G	A	CDS	WD0262	non-synonymous	n/a
273138	substitution	A	G	CDS	WD0292	non-synonymous	n/a
278050	substitution	G	A	CDS	WD0298	non-synonymous	n/a
279147	insertion-before	-	T	intergenic	WD0299,WD0300	n/a	n/a
287099	substitution	G	A	intergenic	WD0306,WD0307	n/a	n/a
297946	substitution	C	T	CDS	WD0317	synonymous	n/a
334514	substitution	G	A	CDS	WD0352	non-synonymous	n/a
346902	substitution	G	A	intergenic	WD0362,WD0363	n/a	n/a
347096	substitution	C	T	CDS	WD0363	premature-stop	n/a
372405	substitution	A	G	intergenic	WD0389,WD0390	n/a	n/a
381187	substitution	T	C	CDS	WD0400	non-synonymous	n/a
398613	substitution	A	G	pseudogene	WD0422	n/a	n/a
409057	substitution	A	G	CDS	WD0427	non-synonymous	n/a
414527	substitution	G	A	CDS	WD0433	non-synonymous	n/a
416891	substitution	C	T	CDS	WD0435	synonymous	n/a
427731	substitution	C	T	CDS	WD0443	non-synonymous	n/a
432674	insertion-before	-	A	intergenic	WD0449,WD0451	n/a	n/a
440973	substitution	A	C	CDS	WD0460	synonymous	n/a
449370	substitution	A	G	intergenic	WD0465,WD0466	n/a	n/a
452129	substitution	C	T	CDS	WD0469	non-synonymous	n/a
463714	substitution	T	C	intergenic	WD0481,WD0482	n/a	n/a
505589	substitution	G	A	CDS	WD0513	non-synonymous	n/a
506438	substitution	C	A	CDS	WD0514	non-synonymous	n/a
517457	substitution	C	T	CDS	WD0530	non-synonymous	n/a
547769	substitution	C	T	CDS	WD0562	non-synonymous	n/a
571424	substitution	G	T	intergenic	WD0591,WD0593	n/a	n/a
587192	substitution	G	T	CDS	WD0609	synonymous	n/a
588436	substitution	T	C	intergenic	WD0609,WD0610	n/a	n/a
591593	substitution	C	G	CDS	WD0610	non-synonymous	n/a
598213	substitution	G	A	CDS	WD0614	non-synonymous	n/a
599593	substitution	G	T	CDS	WD0616	non-synonymous	n/a
616897	substitution	G	T	CDS	WD0630	non-synonymous	n/a
619783	substitution	T	C	CDS	WD0632	non-synonymous	n/a
628654	substitution	G	T	CDS	WD0636	non-synonymous	n/a
629339	substitution	T	C	CDS	WD0637	non-synonymous	n/a
630778	substitution	A	G	CDS	WD0638	non-synonymous	n/a
631303	substitution	T	C	CDS	WD0639	non-synonymous	n/a
650962	substitution	C	T	CDS	WD0666	non-synonymous	n/a
654265	substitution	T	C	CDS	WD0675	synonymous	n/a
655839	substitution	G	A	CDS	WD0678	synonymous	n/a
728880	substitution	T	C	CDS	WD0754	non-synonymous	n/a
730954	substitution	C	G	intergenic	WD0756,WD0757	n/a	n/a
732864	substitution	C	G	CDS	WD0758	non-synonymous	n/a
738991	substitution	A	G	intergenic	WD0765,WD0766	n/a	n/a
739409	substitution	T	G	CDS	WD0766	non-synonymous	n/a
752679	substitution	G	A	intergenic	WD0778,WD0779	n/a	n/a
771939	substitution	G	A	CDS	WD0797	non-synonymous	n/a
776939	substitution	A	G	intergenic	WD0803,WD0804	n/a	n/a
780933	substitution	G	C	CDS	WD0813	non-synonymous	n/a
781622	substitution	A	G	CDS	WD0814	non-synonymous	n/a
782436	substitution	A	G	CDS	WD0816	synonymous	n/a
783958	substitution	C	T	CDS	WD0817	non-synonymous	n/a
802254	substitution	A	G	CDS	WD0835	non-synonymous	n/a
803009	substitution	G	A	CDS	WD0838	non-synonymous	n/a
805011	substitution	G	A	CDS	WD0838	non-synonymous	n/a
805888	substitution	G	C	CDS	WD0839	non-synonymous	n/a
807883	substitution	T	G	CDS	WD0841	non-synonymous	n/a
811613	substitution	G	A	CDS	WD0848	synonymous	In overlapping region of genes WD0847 and WD0848. synonymousonymous in both.
812321	substitution	A	G	intergenic	WD0848,WD0849	n/a	n/a
830307	substitution	C	G	intergenic	WD0858,WD0859	n/a	n/a
838894	substitution	A	G	CDS	WD0867	non-synonymous	n/a
840037	substitution	A	G	intergenic	WD0867,tRNA-Asn-1	n/a	n/a
864709	deletion-from	AATCAAGAT	-	CDS	WD0898	in-frame	n/a
864943	substitution	C	A	CDS	WD0898	non-synonymous	n/a
872208	substitution	G	A	intergenic	WD0906,WD0907	n/a	n/a
872323	substitution	T	C	intergenic	WD0906,WD0907	n/a	n/a
872324	substitution	G	A	intergenic	WD0906,WD0907	n/a	n/a
872326	substitution	T	G	intergenic	WD0906,WD0907	n/a	n/a
872327	substitution	C	A	intergenic	WD0906,WD0907	n/a	n/a
872331	insertion-before	-	T	intergenic	WD0906,WD0907	n/a	n/a
872331	substitution	A	C	intergenic	WD0906,WD0907	n/a	n/a
872375	substitution	T	G	CDS	WD0907	non-synonymous	n/a
881844	substitution	C	G	CDS	WD0914	non-synonymous	n/a
889384	substitution	G	A	CDS	WD0924	synonymous	n/a
914712	substitution	G	C	intergenic	WD0954,WD0955	n/a	n/a
917945	substitution	A	G	intergenic	WD0957,WD0958	n/a	n/a
949888	substitution	G	A	CDS	WD0992	synonymous	n/a
988727	substitution	C	T	intergenic	WD1027,WD1028	n/a	n/a
989918	substitution	C	G	CDS	WD1029	non-synonymous	n/a
1006082	insertion-before	-	T	CDS	WD1043	frameshift	Results in joining of WD1043 and WD1044 into single CDS.
1006175	substitution	G	A	CDS	WD1044	non-synonymous	n/a
1009261	substitution	G	A	CDS	WD1047	synonymous	n/a
1011900	substitution	C	T	intergenic	WD1049,WD1050	n/a	n/a
1014864	substitution	C	T	CDS	WD1052	non-synonymous	n/a
1017650	substitution	T	C	CDS	WD1055	synonymous	n/a
1020476	insertion-before	-	T	intergenic	WD1059,WD1060	n/a	n/a
1024202	substitution	A	G	CDS	WD1064	non-synonymous	n/a
1027577	substitution	T	C	intergenic	WD1068,WD1069	n/a	n/a
1029091	insertion-before	-	AAGAGGGCTCTGGGATGACAG	intergenic	WD1070,WD1071	n/a	n/a
1031922	substitution	G	A	CDS	WD1073	non-synonymous	n/a
1046613	substitution	C	T	CDS	WD1086	non-synonymous	n/a
1048565	substitution	T	C	CDS	WD1090	non-synonymous	n/a
1077859	substitution	T	C	CDS	WD1128	non-synonymous	n/a
1091606	substitution	T	C	CDS	WD1140	non-synonymous	n/a
1094459	insertion-before	-	T	intergenic	WD1142,WD1143	n/a	n/a
1097797	substitution	T	A	intergenic	WD1146,WD1147	n/a	n/a
1103469	deletion-from	T	-	CDS	WD1155	frameshift	Results in longer CDS (encoding extra 17 amino acids)
1107862	substitution	T	C	CDS	WD1160	non-synonymous	n/a
1125117	substitution	T	C	CDS	WD1176	synonymous	n/a
1126107	substitution	G	A	CDS	WD1177	non-synonymous	n/a
1135851	substitution	T	C	intergenic	WD1189,WD1190	n/a	n/a
1142691	substitution	T	C	CDS	WD1197	synonymous	n/a
1144825	deletion-from	TGTTGGTTT	-	CDS	WD1199	in-frame	n/a
1145254	substitution	T	C	CDS	WD1199	synonymous	n/a
1147604	substitution	G	C	CDS	WD1200	non-synonymous	n/a
1152452	substitution	T	C	CDS	WD1203	synonymous	n/a
1161851	insertion-before	-	T	intergenic	WD1214,WD1215	n/a	n/a
1163171	deletion-from	C	-	CDS	WD1215	frameshift	Results in joining WD1215 and WD1216 into single CDS.
1164424	substitution	C	T	CDS	WD1216	non-synonymous	n/a
1165158	substitution	G	A	CDS	WD1217	synonymous	n/a
1177854	deletion-from	C	-	CDS	WD1231	frameshift	Results in joining WD1231 and WD1232 into single CDS.
1183214	substitution	C	T	CDS	WD1237	synonymous	n/a
1185021	substitution	G	A	CDS	WD1237	non-synonymous	n/a
1206452	substitution	T	C	intergenic	WD1260,WD1261	n/a	n/a
1207767	substitution	G	A	CDS	WD1262	synonymous	n/a
1212319	substitution	G	T	CDS	WD1269	non-synonymous	n/a
1217973	substitution	G	A	CDS	WD1277	synonymous	n/a
1220566	substitution	A	G	CDS	WD1278	non-synonymous	n/a
1220989	substitution	A	G	CDS	WD1278	non-synonymous	n/a
1232581	substitution	C	T	CDS	WD1292	non-synonymous	n/a
1239247	substitution	C	T	CDS	WD1297	non-synonymous	n/a
1241472	substitution	C	T	CDS	WD1298	non-synonymous	n/a
1247609	substitution	A	G	intergenic	WD1306,WD1307	n/a	n/a
1253148	substitution	C	T	CDS	WD1312	non-synonymous	n/a
1257022	substitution	G	T	intergenic	WD1315,WD1316	n/a	n/a
1260309	substitution	C	T	CDS	WD1318	non-synonymous	n/a

## Sheet: summary table
Locations of different types of variants detected between wMel and wMelPop
	Insertions	Deletions	SNPs	Total
CDSs	2	6	104	112
intergenic	8	2	32	42
pseudogene	0	0	1	1
rRNA	0	0	1	1
Total	10	8	138	156
